# Supplementary material for: A Phase II Study of Atezolizumab, Pertuzumab, and High-Dose Trastuzumab for Central Nervous System Metastases in Patients with HER2-Positive Breast Cancer
Source: PubMed Central journal article supplement — Clin Cancer Res. 2024 Sep 3;30(21):4856–65. doi: 10.1158/1078-0432.CCR-24-1161 (PMC11528201; doi:10.1158/1078-0432.ccr-24-1161), 2024-09-03

**Supplementary Figure S1.** Duration of clinical benefit at 18 and 24 weeks by RECIST 1.1. Data on response rates for patients with confirmed CR, PR, or SD (n = 19). Abbreviations: CR, complete response; PR, partial response; SD, stable disease.

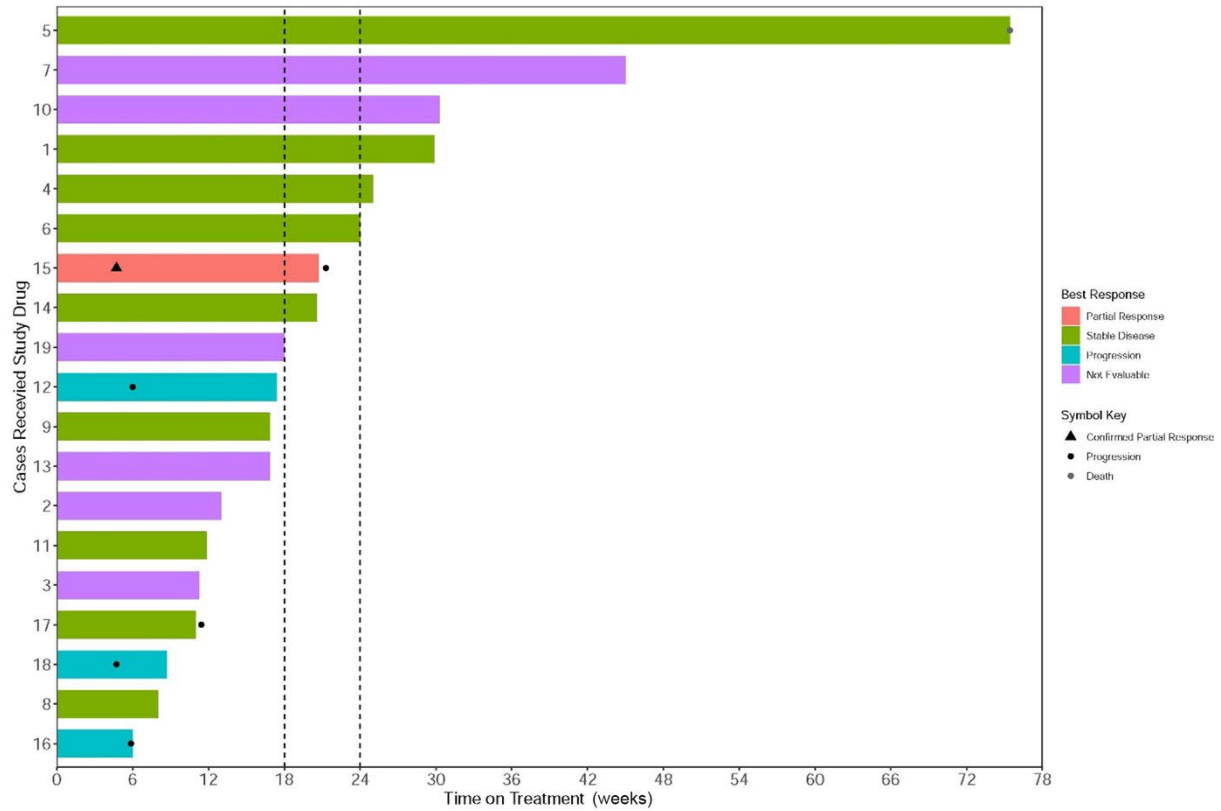

Supplement: ccr-24-1161_supplementary_figure_s1_suppsf1.pdf [file ccr-24-1161_supplementary_figure_s1_suppsf1.pdf]
