# Supplementary material for: A Phase II Study of Atezolizumab, Pertuzumab, and High-Dose Trastuzumab for Central Nervous System Metastases in Patients with HER2-Positive Breast Cancer
Source: PubMed Central journal article supplement — Clin Cancer Res. 2024 Sep 3;30(21):4856–65. doi: 10.1158/1078-0432.CCR-24-1161 (PMC11528201; doi:10.1158/1078-0432.ccr-24-1161), 2024-09-03

**Supplementary Figure S2.** Bi-compartmental PFS. Median bi-compartmental PFS was 12.1 months (95% CI 11.4-NA) for the 19 patients enrolled in the study. Bi-compartmental PFS is defined as either progression in the CNS, according to RANO-BM criteria, and/or progression in non-CNS sites, according to Response Evaluation Criteria in Solid Tumors (RECIST) 1.1.

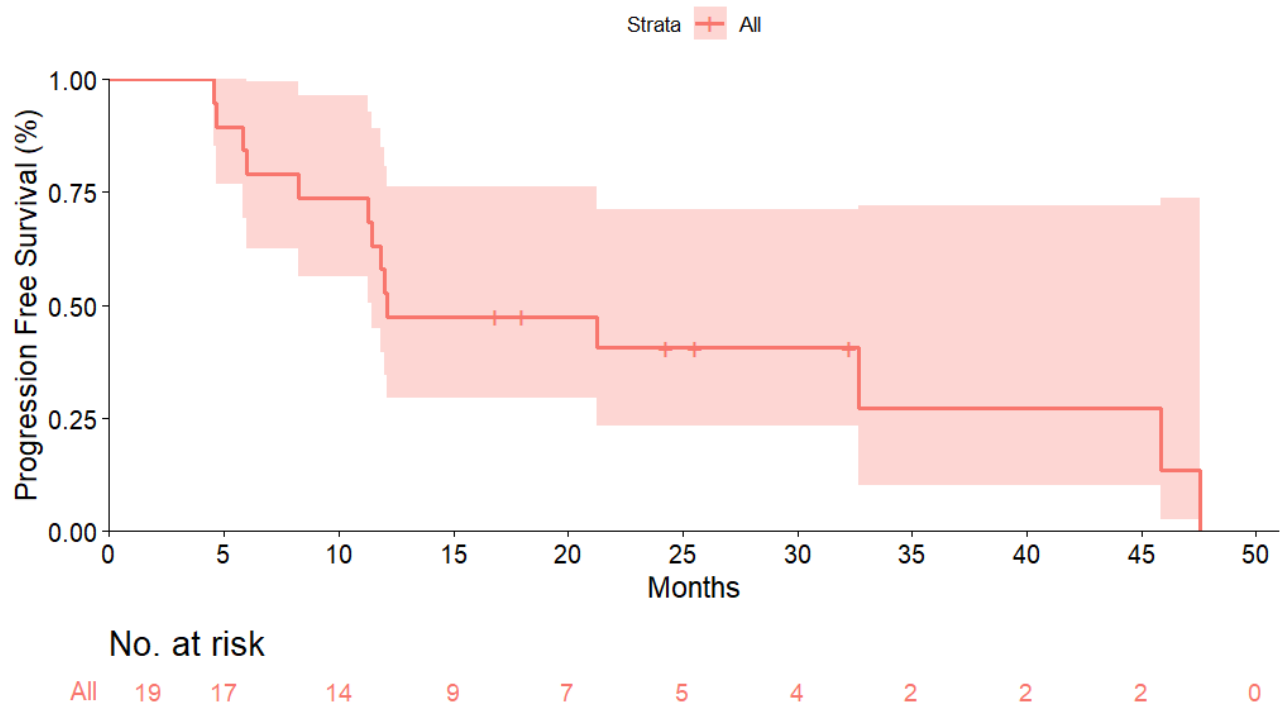

Supplement: ccr-24-1161_supplementary_figure_s2_suppsf2.pdf [file ccr-24-1161_supplementary_figure_s2_suppsf2.pdf]
