# Supplementary material for: A Phase II Study of Atezolizumab, Pertuzumab, and High-Dose Trastuzumab for Central Nervous System Metastases in Patients with HER2-Positive Breast Cancer
Source: PubMed Central journal article supplement — Clin Cancer Res. 2024 Sep 3;30(21):4856–65. doi: 10.1158/1078-0432.CCR-24-1161 (PMC11528201; doi:10.1158/1078-0432.ccr-24-1161), 2024-09-03
Supplement: ccr-24-1161_supplementary_table_s2_suppst2.pdf [file ccr-24-1161_supplementary_table_s2_suppst2.pdf]

**Supplementary Table S2. Prior chemotherapy regimens for each subject**

| Case # | Regimen                                        |
|--------|------------------------------------------------|
| 1      | Trastuzumab/Pertuzumab/Docetaxel               |
|        | Ado-trastuzumab Emtansine                      |
|        | Lapatinib/Trastuzumab                          |
|        | Capecitabine/Trastuzumab                       |
|        | Eribulin/Trastuzumab                           |
|        | XL184/Trastuzumab                              |
|        | Doxorubicin Hydrochloride Liposome/Trastuzumab |
|        | Gemcitabine/Trastuzumab                        |
|        | Vinorelbine/Trastuzumab                        |
| 2      | Paclitaxel/Pertuzumab/Trastuzumab              |
|        | Ado-trastuzumab Emtansine/Palbociclib          |
|        | Trastuzumab/Capecitabine                       |
|        | Trastuzumab/Eribulin                           |
|        | Trastuzumab/XL184                              |
| 3      | Capecitabine/Lapatinib/Trastuzumab             |
|        | Pertuzumab/Trastuzumab/Vinorelbine             |
| 4      | Docetaxel/Trastuzumab/Pertuzumab               |
| 5      | TCH                                            |
|        | Capecitabine                                   |
|        | Ado-trastuzumab Emtansine                      |
|        | Docetaxel/Trastuzumab/Pertuzumab               |
| 6      | Ado-trastuzumab Emtansine                      |
|        | Eribulin/Trastuzumab/Pertuzumab                |
|        | Trastuzumab                                    |
| 7      | Lapatinib/Capecitabine                         |
|        | Sorafenib                                      |
|        | Ado-trastuzumab Emtansine                      |
|        | Trastuzumab/Doxorubicin Hydrochloride Liposome |
| 8      | Vinorelbine/Trastuzumab                        |
|        | Trastuzumab/Vinorelbine/Pertuzumab             |
| 9      | Pertuzumab/Trastuzumab/Paclitaxel              |
|        | Ado-trastuzumab Emtansine                      |
| 10     | Trastuzumab/Pertuzumab                         |
| 11     | Trastuzumab/Paclitaxel/Pertuzumab              |
|        | Trastuzumab/Pertuzumab/Denosumab               |
| 12     | Trastuzumab/Docetaxel/Pertuzumab               |
|        | Ado-trastuzumab Emtansine                      |
|        | Capecitabine/Lapatinib                         |
|        | Eribulin/Trastuzumab                           |
|        | Ixabepilone                                    |

|    |                                                |
|----|------------------------------------------------|
| 13 | Capecitabine/Lapatinib/Pertuzumab/Tamoxifen    |
|    | Ado-trastuzumab Emtansine                      |
| 14 | Trastuzumab/Docetaxel/Pertuzumab               |
|    | Ado-trastuzumab Emtansine                      |
| 15 | Lapatinib/Trastuzumab                          |
|    | Capecitabine/Trastuzumab/Lapatinib             |
|    | Trastuzumab/Other Therapy                      |
|    | Ado-trastuzumab Emtansine                      |
|    | Trastuzumab/Pertuzumab/Abraxane                |
|    | Trastuzumab/Lapatinib/Entinostat               |
|    | Trastuzumab/Lapatinib                          |
|    | Ado-trastuzumab Emtansine                      |
|    | Trastuzumab                                    |
|    | Trastuzumab/Lapatinib                          |
|    | Trastuzumab/Pertuzumab/Taselisib               |
|    | Cisplatin/Trastuzumab                          |
|    | Lapatinib/Trastuzumab                          |
|    | Trastuzumab/Eribulin                           |
|    | Doxorubicin Hydrochloride Liposome/Trastuzumab |
| 16 | Docetaxel/Trastuzumab/Carboplatin/Pertuzumab   |
|    | Ado-trastuzumab Emtansine                      |
|    | Lapatinib/Capecitabine                         |
|    | Neratinib                                      |
| 17 | Trastuzumab/Pertuzumab                         |
| 18 | Docetaxel/Trastuzumab/Pertuzumab               |
