# Supplementary material for: A Phase II Study of Atezolizumab, Pertuzumab, and High-Dose Trastuzumab for Central Nervous System Metastases in Patients with HER2-Positive Breast Cancer
Source: PubMed Central journal article supplement — Clin Cancer Res. 2024 Sep 3;30(21):4856–65. doi: 10.1158/1078-0432.CCR-24-1161 (PMC11528201; doi:10.1158/1078-0432.ccr-24-1161), 2024-09-03
Supplement: ccr-24-1161_supplementary_table_s3_suppst3.pdf [file ccr-24-1161_supplementary_table_s3_suppst3.pdf]

**Supplementary Table S3.** Additional baseline patient and disease characteristics

| Characteristic                                     | N = 19              |
|----------------------------------------------------|---------------------|
|                                                    | No. of Patients (%) |
| <b>Ethnicity</b>                                   |                     |
| Hispanic or Latino                                 | 0 (0%)              |
| Non-Hispanic                                       | 19 (100%)           |
| <b>Institution</b>                                 |                     |
| Dana-Farber Cancer Institute                       | 11 (57.9%)          |
| Northwestern University Hospital                   | 8 (42.1%)           |
| <b>Hormone receptor status of metastatic tumor</b> |                     |
| ER and PR positive                                 | 1 (5.3%)            |
| ER positive/PR negative                            | 2 (10.5%)           |
| ER negative/PR positive                            | 1 (5.3%)            |
| ER and PR negative                                 | 10 (52.6%)          |
| Unknown                                            | 5 (26.3%)           |
| <b>Adjuvant or neoadjuvant chemotherapy</b>        |                     |
| Adjuvant or neoadjuvant anthracycline              | 6 (31.6%)           |
| Adjuvant or neoadjuvant taxane                     | 13 (68.4%)          |
| Adjuvant or neoadjuvant trastuzumab                | 11 (57.9%)          |
| Adjuvant or neoadjuvant pertuzumab                 | 5 (26.3%)           |
| Other Adjuvant or neoadjuvant therapy              | 10 (52.6%)          |
| <b>Use of corticosteroids</b>                      |                     |
| Yes                                                | 5 (26.3%)           |
| No                                                 | 14 (73.7%)          |

Abbreviations: ER, estrogen receptor; PR, progesterone receptor.
