# Supplementary material for: A Phase II Study of Atezolizumab, Pertuzumab, and High-Dose Trastuzumab for Central Nervous System Metastases in Patients with HER2-Positive Breast Cancer
Source: PubMed Central journal article supplement — Clin Cancer Res. 2024 Sep 3;30(21):4856–65. doi: 10.1158/1078-0432.CCR-24-1161 (PMC11528201; doi:10.1158/1078-0432.ccr-24-1161), 2024-09-03
Supplement: ccr-24-1161_supplementary_table_s4_suppst4.pdf [file ccr-24-1161_supplementary_table_s4_suppst4.pdf]

**Supplementary Table S4. Best Extracranial Response by RECIST 1.1**

| <b>Response</b>    | <b>N = 19 (%)</b> |
|--------------------|-------------------|
| CR                 | 0 (0%)            |
| PR                 | 1 (5.3%)          |
| SD $\geq$ 24 weeks | 4 (21.1%)         |
| SD $<$ 24 weeks    | 5 (26.3%)         |
| PD                 | 3 (15.8%)         |
| By RECIST 1.1      | 3 (15.8%)         |
| Not evaluable*     | 6 (31.6%)         |

**\* 6 patients have neither extracranial target lesion nor non-target lesion**

Abbreviations: CR, complete response; PR, partial response; SD, stable disease; PD, progressive disease
