# Supplementary material for: A Phase II Study of Atezolizumab, Pertuzumab, and High-Dose Trastuzumab for Central Nervous System Metastases in Patients with HER2-Positive Breast Cancer
Source: PubMed Central journal article supplement — Clin Cancer Res. 2024 Sep 3;30(21):4856–65. doi: 10.1158/1078-0432.CCR-24-1161 (PMC11528201; doi:10.1158/1078-0432.ccr-24-1161), 2024-09-03
Supplement: ccr-24-1161_supplementary_table_s5_suppst5.pdf [file ccr-24-1161_supplementary_table_s5_suppst5.pdf]

**Supplementary Table S5. Treatment details**

|                                                                   |            |
|-------------------------------------------------------------------|------------|
| Total number of cycles administered                               | 138        |
| Number of cycles per patient (median, range)                      | 6 (2 – 22) |
| Number of patients with dose delay or hold                        | 7          |
| Number of patients with dose reduction                            | 4          |
| Number of patients in which atezolizumab was discontinued         | 1          |
| Number of patients in which pertuzumab was discontinued           | 0          |
| Number of patients in which trastuzumab was discontinued          | 0          |
| <b>Reasons for atezolizumab dose delay, modification or hold*</b> |            |
| Toxicity                                                          | 10         |
| Platelet count decreased                                          | 4          |
| Diarrhea                                                          | 2          |
| Creatinine increased                                              | 1          |
| Dyspnea                                                           | 1          |
| Heart failure                                                     | 1          |
| Lung infection                                                    | 1          |
| Pneumonitis                                                       | 1          |
| Scheduling problems                                               | 3          |
| Patient Request                                                   | 0          |
| Patient Compliance                                                | 1          |
| Others                                                            | 2          |
| <b>Reasons for pertuzumab dose delay, modification or hold</b>    |            |
| Toxicity                                                          | 12         |
| Diarrhea                                                          | 4          |
| Platelet count decreased                                          | 4          |
| Anorexia                                                          | 2          |
| Creatinine increased                                              | 2          |
| Nausea                                                            | 2          |
| Chills                                                            | 1          |
| Dry mouth                                                         | 1          |
| Dyspnea                                                           | 1          |
| Fatigue                                                           | 1          |
| Heart failure                                                     | 1          |
| Hyperglycemia                                                     | 1          |
| Lung infection                                                    | 1          |
| Rash, maculo-papular                                              | 1          |
| Urinary frequency                                                 | 1          |
| Vomiting                                                          | 1          |
| Weight loss                                                       | 1          |

|                                                                 |    |
|-----------------------------------------------------------------|----|
| Scheduling problems                                             | 4  |
| Patient Request                                                 | 0  |
| Patient Compliance                                              | 1  |
| Others                                                          | 0  |
|                                                                 |    |
| <b>Reasons for trastuzumab dose delay, modification or hold</b> |    |
| Toxicity                                                        | 10 |
| Platelet count decreased                                        | 4  |
| Anorexia                                                        | 2  |
| Creatinine increased                                            | 2  |
| Diarrhea                                                        | 2  |
| Nausea                                                          | 2  |
| Chills                                                          | 1  |
| Dry mouth                                                       | 1  |
| Dyspnea                                                         | 1  |
| Fatigue                                                         | 1  |
| Heart failure                                                   | 1  |
| Hyperglycemia                                                   | 1  |
| Lung infection                                                  | 1  |
| Rash maculo-papular                                             | 1  |
| Urinary frequency                                               | 1  |
| Vomiting                                                        | 1  |
| Weight loss                                                     | 1  |
| Scheduling problems                                             | 6  |
| Patient Request                                                 | 0  |
| Patient Compliance                                              | 1  |
| Others                                                          | 4  |
|                                                                 |    |

\* 15 cycles have dose hold, 1 cycle (case 7, cycle 13) has more than one reason
