# Supplementary material for: A Phase II Study of Atezolizumab, Pertuzumab, and High-Dose Trastuzumab for Central Nervous System Metastases in Patients with HER2-Positive Breast Cancer
Source: PubMed Central journal article supplement — Clin Cancer Res. 2024 Sep 3;30(21):4856–65. doi: 10.1158/1078-0432.CCR-24-1161 (PMC11528201; doi:10.1158/1078-0432.ccr-24-1161), 2024-09-03
Supplement: ccr-24-1161_supplementary_table_s6_suppst6.pdf [file ccr-24-1161_supplementary_table_s6_suppst6.pdf]

**Supplementary Table S6. Tumor Mutational Burden (TMB)**

| <b>Patient ID Number</b> | <b>TMB</b> |
|--------------------------|------------|
| 1                        | 1.2        |
| 2                        | 4.8        |
| 3*                       | 9.1        |
| 4                        | N/A        |
| 5                        | N/A        |
| 6                        | 8.5        |
| 7*                       | 12.2       |
| 8                        | N/A        |
| 9                        | 15.7       |
| 10*                      | 1.5        |
| 11                       | 4.6        |
| 12                       | 8.0        |
| 13                       | 4.6        |
| 14                       | 14.5       |
| 15                       | 3.8        |
| 16                       | N/A        |
| 17                       | N/A        |
| 18                       | N/A        |
| 19*                      | 14.6       |

N/A TMB not available. \* In patients 3, 7, 10, and 19 TMB was obtained from CNS tissue.
